# Supplementary material for: Accurate assembly of ferrocene-functionalized {Ti22Fc4} clusters with photocatalytic amine oxidation activity
Source: Royal Society of Chemistry journal article supplement (doi:10.1039/d1cc00019e), 2021-01-01
Supplement: d1cc00019e1.pdf [file d1cc00019e1.pdf]

## Supporting Information

# Accurate Assembly of Ferrocene-Functionalized $\{\text{Ti}_{22}\text{Fc}_4\}$ Cluster with Photocatalytic Amines Oxidation Activity

Er-Meng Han,<sup>a‡</sup> Wei-Dong Yu,<sup>b‡</sup> Jiao-Lei Li,<sup>c</sup> Xiao-Yi Yi,<sup>a</sup> Jun Yan<sup>a</sup> Chao Liu<sup>a\*</sup>

<sup>a</sup> Hunan Provincial Key Laboratory of Chemical Power Sources, College of Chemistry and Chemical Engineering, Central South University, Changsha 410083, Hunan, P. R. China

<sup>b</sup> Hunan Institute of Nuclear Agricultural Science and Space Breeding, Hunan Academy of Agricultural Science, Changsha 410000, P. R. China.

<sup>c</sup> Jilin Provincial Science and Technology Innovation Center of Optical Materials and Chemistry, School of Chemical and Environmental Engineering, Changchun University of Science and Technology, Changchun, Jilin 130022, China

\*(Chao Liu) E-mail: [chaoliu@csu.edu.cn](mailto:chaoliu@csu.edu.cn)

### 1. Experimental section

**Materials and Characterization.** All reagents were purchased commercially and were not further purified before use. Powder X-ray diffraction (PXRD) analysis was performed on a Rigaku Mini Flex II diffractometer at a  $2\theta$  range of  $5\text{--}50^\circ$  ( $5^\circ \text{min}^{-1}$ ) with  $\text{CuK}\alpha$  radiation ( $\lambda = 1.54056 \text{ \AA}$ ). The solid-state UV/Vis spectra of the cluster samples were obtained on UV-4000 spectrophotometer. Fourier transform infrared spectroscopy (FTIR) data ( $4000\text{--}400 \text{ cm}^{-1}$ ) was collected on a PerkinElmer Spectrum 100 FT-IR Spectrometer. Thermogravimetric analyses (TGA) were performed on a Mettler Toledo TGA/SDTA 851e analyzer in  $\text{N}_2$  at a temperature range of  $50\text{--}800^\circ\text{C}$  ( $10^\circ\text{C min}^{-1}$ ). Crystallographic data for this article were obtained on a Bruker Apex II CCD diffractometer with graphite-mono-chromated Mo/Cu K $\alpha$  radiation. The structures were solved by direct methods and refined on  $F^2$  by full matrix least-squares using new SHELXL program. All of the non-hydrogen atoms are located from Fourier maps and are refined anisotropically.

**Synthesis of cluster  $[\text{Ti}_5(\text{u}_3\text{-O})_3(\text{O}^i\text{Pr})_9(\text{Fdc})(\text{Dmg})(\text{Pdc})]$  ( $\text{Ti}_5\text{Fc}$ ).**  $\text{DmgH}_2$  (17 mg, 0.147 mmol),  $\text{FdcH}_2$  (55.2 mg, 0.24 mmol), 2,3-pyrazine dicarboxylic acid (18.6 mg, 0.1 mmol) and 3 mL isopropanol were added into a 25 mL Teflon lined stainless steel autoclave, and then combined with  $\text{Ti}(\text{O}^i\text{Pr})_4$  (300  $\mu\text{L}$ , 0.975 mmol). The solution was sonicated for 5 min, then transferred to an oven at  $100^\circ\text{C}$  for 3 days. After cooling to room temperature, yellow block crystals of  $\{\text{Ti}_5\text{Fc}\}$  were obtained and washed with acetonitrile, then dried at room temperature. Yield: about 120 mg.

**Synthesis of clusters  $[\text{Ti}_{11}(\text{u}_3\text{-O})_9](\text{O}^i\text{Pr})_{12}(\text{Fdc})_2(\text{Dmg})_5$  ( $\text{Ti}_{11}\text{Fc}_2$ ) and  $[\text{Ti}_{22}(\text{u}_3\text{-O})_{18}](\text{O}^i\text{Pr})_{30}(\text{Fdc})_4(\text{Dmg})_7$  ( $\text{Ti}_{22}\text{Fc}_4$ ).**  $\text{DmgH}_2$  (17 mg, 0.147 mmol),  $\text{FdcH}_2$  (55.2 mg, 0.24 mmol), and 5 mL isopropanol were added into a 25 mL Teflon lined stainless steel autoclave. Then  $\text{Ti}(\text{O}^i\text{Pr})_4$  (300  $\mu\text{L}$ , 0.975 mmol) was added and transferred to an oven at  $100^\circ\text{C}$  for 3 days. After cooling to room temperature, yellow needle-like crystals of  $\{\text{Ti}_{22}\text{Fc}_4\}$  and yellow plate-like crystals of  $\{\text{Ti}_{11}\text{Fc}_2\}$  were obtained in about 3:1 ratio. The two crystals are very different in color and shape, and can be separated manually. Total yield: about 80 mg.

**Individual synthesis of the cluster  $\{\text{Ti}_{22}\text{Fc}_4\}$ .**  $\text{DmgH}_2$  (35 mg, 0.3 mmol),  $\text{FdcH}_2$  (55.2 mg, 0.24 mmol), benzoic acid (29.3 mg, 0.24 mmol) or isonicotinic acid (29.5 mg, 0.24 mmol), and 5 mL isopropanol were added into a 25 mL Teflon lined stainless steel autoclave. Then  $\text{Ti}(\text{O}^i\text{Pr})_4$  (300  $\mu\text{L}$ , 0.975 mmol) was added and transferred to an oven at  $100^\circ\text{C}$  for 3 days. After cooling to room temperature, yellow needle-like crystals of  $\{\text{Ti}_{22}\text{Fc}_4\}$  were obtained, and only a very small amount of plate-shaped crystals of  $\{\text{Ti}_{11}\text{Fc}_2\}$  was found in the mother liquor. Total yield: about 75 mg.

**Individual synthesis of cluster  $\{\text{Ti}_{11}\text{Fc}_2\}$ .** DmgH<sub>2</sub> (35 mg, 0.3 mmol), FdcH<sub>2</sub> (55.2 mg, 0.24 mmol), and 6 mL isopropanol were added into a 25 mL Teflon lined stainless steel autoclave. Then Ti(O<sup>i</sup>Pr)<sub>4</sub> (500 μL, 1.63 mmol) was added and transferred to an oven at 120 °C for 3 days. After cooling to room temperature, a small amount of yellow plate-like crystals of  $\{\text{Ti}_{11}\text{Fc}_2\}$  was obtained (Yield: about 30 mg). However, almost no plate-like crystals of  $\{\text{Ti}_{11}\text{Fc}_2\}$  were found in the mother liquor.

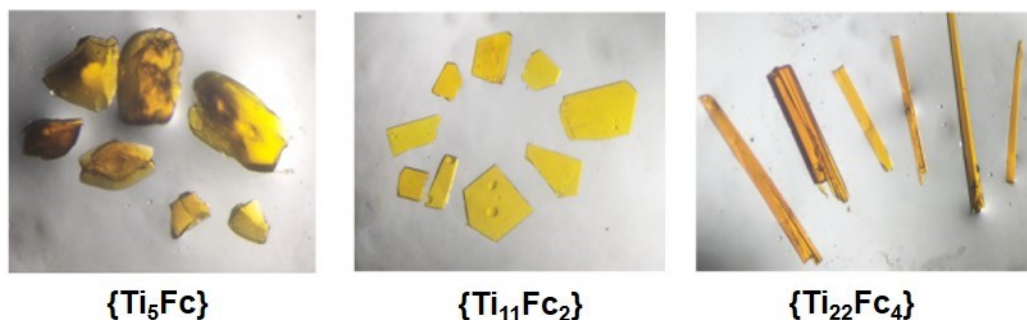

**Figure S1.** Crystal pictures of the clusters.

**Photoelectrochemical measurements** were performed on a CHI 660e electrochemical workstation in a standard three-electrode electrochemical cell with a working electrode, a platinum plate as the counter electrode, and a saturated calomel electrode as the reference electrode. These three electrodes were immersed in the 0.2M Na<sub>2</sub>SO<sub>4</sub> aqueous solution (pH = 6.6). A 300 W high-pressure xenon lamp with UV cut-off filter was used as a full-wavelength light source, located 20 cm away from the working electrode. The on-off cycling irradiation intervals are 20 s. The working electrode was prepared on fluorinedoped tin oxide (FTO) glass. The colloidal dispersion was obtained by ultrasonic treatment of 5 mg ground crystal sample in 1 ml ethanol for 30 min, and then the dispersion was dropped onto FTO glass (0.75 cm<sup>2</sup> area). After evaporation under an ambient atmosphere for 2 h, the coating film was obtained and used as the working electrode.

**Typical procedure for the oxidation of amines.** The photocatalytic reactions were carried out under irradiation by a Xe lamp (300 W, PLS-SXE 300, Beijing Trusttech Co.) equipped with a cutoff filter to filter out light below 420 nm and a broad band filter to cutoff light above 750 nm, with magnetic stirring in a 10 mL Pyrex glass bottle. The bottle was sealed with a rubber stopper wrapped in aluminum foil. Benzylamine (1 mmol), catalyst (0.02 mmol), TBHP (300 mL) and solvent (2 mL) were added in a glass bottle. The reaction was stirred at 70°C under irradiation from the Xe lamp. After reaction, the mixtures were analyzed by GC and <sup>1</sup>H NMR. The catalysts were collected by filtration and washed with CH<sub>3</sub>CN, and reused for the subsequent catalytic reactions.

## 2. Structure of Compounds

**Table S1.** X-ray measurements and structure solution of compounds.

| Compounds                               | $\{\text{Ti}_5\text{Fc}\}$                                                        | $\{\text{Ti}_{11}\text{Fc}_2\}$                                                                   | $\{\text{Ti}_{22}\text{Fc}_4\}$                                                                    |
|-----------------------------------------|-----------------------------------------------------------------------------------|---------------------------------------------------------------------------------------------------|----------------------------------------------------------------------------------------------------|
| CCDC                                    | 2053563                                                                           | 2053564                                                                                           | 2053565                                                                                            |
| Formula                                 | C <sub>53</sub> H <sub>85</sub> N <sub>3</sub> O <sub>22</sub> Ti <sub>5</sub> Fe | C <sub>83</sub> H <sub>137</sub> N <sub>10</sub> O <sub>39</sub> Ti <sub>11</sub> Fe <sub>2</sub> | C <sub>166</sub> H <sub>274</sub> N <sub>12</sub> O <sub>80</sub> Ti <sub>22</sub> Fe <sub>4</sub> |
| F <sub>w</sub>                          | 1411.58                                                                           | 2537.62                                                                                           | 4994.27                                                                                            |
| Crystal system                          | Triclinic                                                                         | monoclinic                                                                                        | triclinic                                                                                          |
| Space group                             | P-1                                                                               | P2 <sub>1</sub> /c                                                                                | P-1                                                                                                |
| a, Å                                    | 13.5246(11)                                                                       | 21.8611(6)                                                                                        | 22.0941(6)                                                                                         |
| b, Å                                    | 14.1422(11)                                                                       | 21.3692(5)                                                                                        | 22.6404(7)                                                                                         |
| c, Å                                    | 20.7800(15)                                                                       | 25.6759(9)                                                                                        | 25.2924(8)                                                                                         |
| α/°                                     | 78.353(3)                                                                         | 90                                                                                                | 114.7150(10)                                                                                       |
| β/°                                     | 76.753(2)                                                                         | 110.058(3)                                                                                        | 95.4110(10)                                                                                        |
| γ/°                                     | 63.302(2)                                                                         | 90                                                                                                | 91.8360(10)                                                                                        |
| V, Å <sup>3</sup>                       | 3433.9(5)                                                                         | 11267.1(6)                                                                                        | 11405.8(6)                                                                                         |
| Z                                       | 2                                                                                 | 4                                                                                                 | 2                                                                                                  |
| ρ <sub>calcd</sub> (gcm <sup>-3</sup> ) | 1.365                                                                             | 1.468                                                                                             | 1.447                                                                                              |

|                                                      |               |               |                |
|------------------------------------------------------|---------------|---------------|----------------|
| $\mu$ (mm <sup>-1</sup> )                            | 0.829         | 8.938         | 1.048          |
| F(000)                                               | 1472.0        | 5124.0        | 5134.0         |
| Data/restraints/parameter                            | 13385/78/879  | 20948/88/1351 | 39999/283/2698 |
| Goof                                                 | 1.022         | 1.031         | 1.073          |
| R <sub>1</sub> /wR <sub>2</sub> (I > 2 $\sigma$ (I)) | 0.0474/0.1186 | 0.0675/0.1689 | 0.0858/0.2366  |
| R <sub>1</sub> /wR <sub>2</sub> (all data)           | 0.0640/0.1335 | 0.1018/0.1951 | 0.1631/0.2683  |

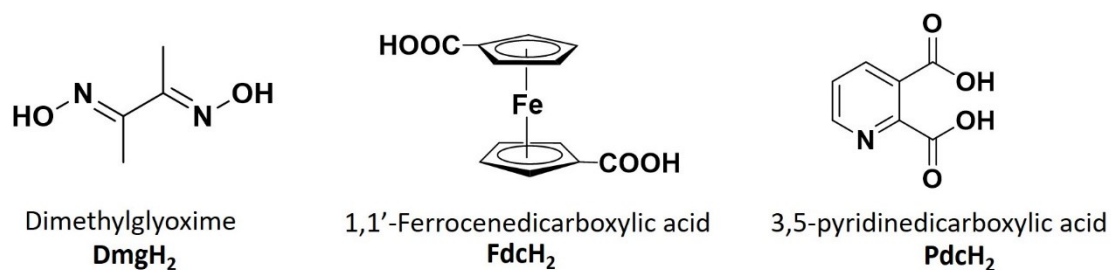

**Figure S2.** The molecular structures of all three ligands used in this work.

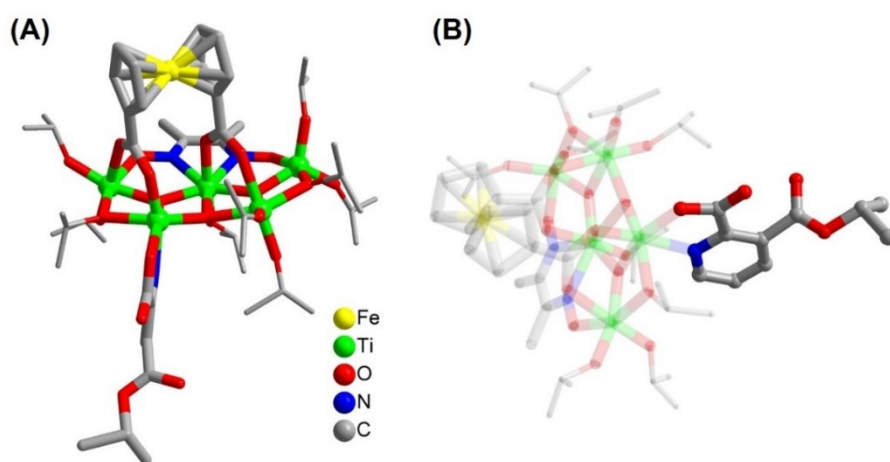

**Figure S3.** (A) Crystal structure of the cluster  $\{\text{Ti}_5\text{Fe}\}$ . (B) Pdch<sup>2-</sup> ligand has three coordination groups, which are bonded to the Ti<sub>5</sub> layer through a pyridine N and a carboxylic O. Interestingly, another uncoordinated carboxylic group reacts with the isopropanol molecule in situ to form an ester bond.

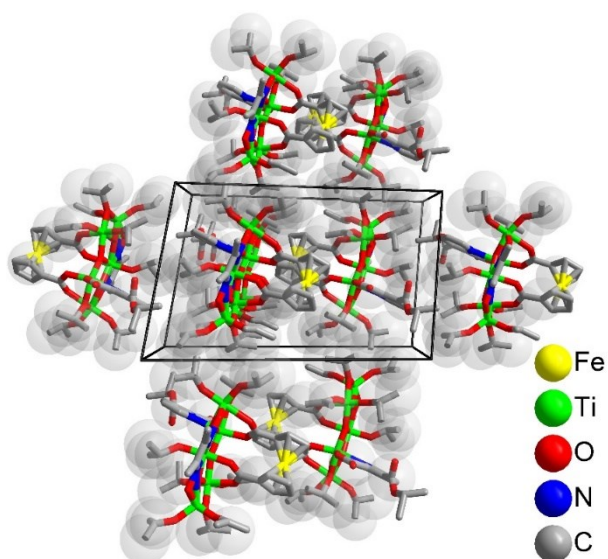

**Figure S4.** Three-dimensional packing structure of the cluster  $\{\text{Ti}_5\text{Fc}\}$ .

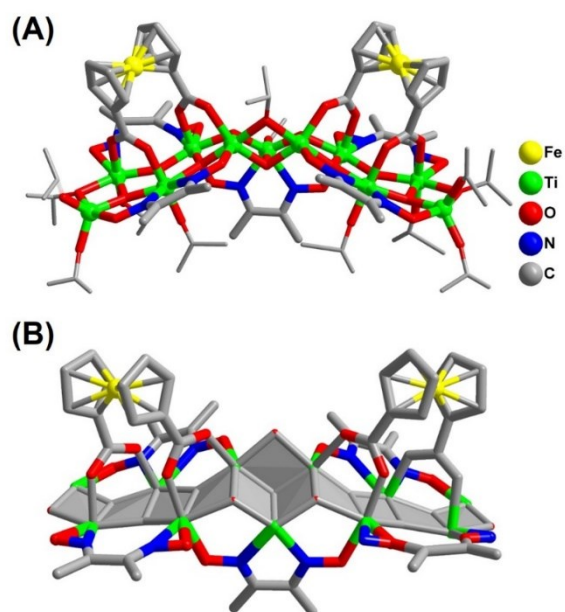

**Figure S5.** (A) Crystal structure of  $\{\text{Ti}_{11}\text{Fc}_2\}$ . (B) The simplified  $\{\text{Dmg}_7\text{@Fdc}_2\text{@Ti}_{11}\}$  unit in  $\{\text{Ti}_{11}\text{Fc}_2\}$ .

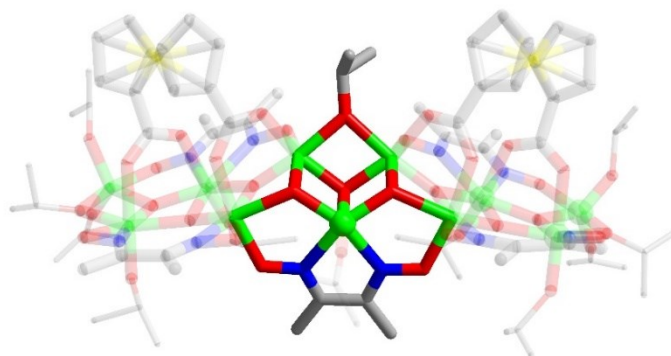

**Figure S6.** Two  $\{\text{Ti}_5\text{Fc}\}$  subunits are bridged together by one  $\{\text{Dmg@Ti}\}$  unit, three  $\mu_3\text{-O}^{2-}$  atom and one O<sup>*i*</sup>Pr group.

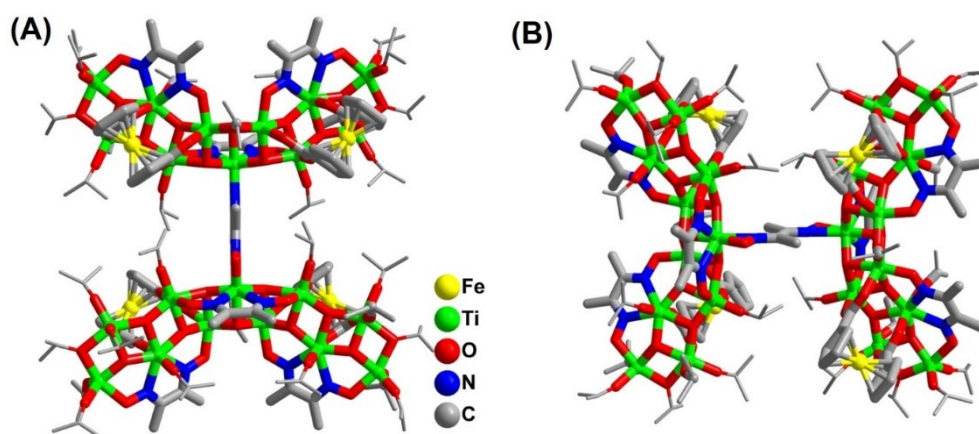

**Figure S7.** Two different perspectives of the crystal structure of  $\{\text{Ti}_{22}\text{Fc}_4\}$

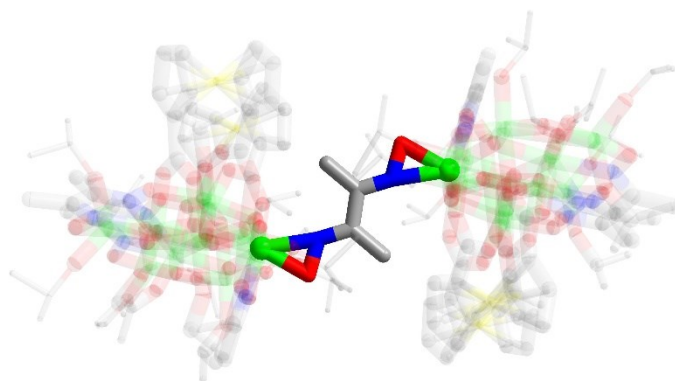

**Figure S8.** The big  $\{\text{Ti}_{22}\text{Fc}_4\}$  structure can be viewed as two  $\{\text{Dmg}_3@\text{Fdc}_2@\text{Ti}_{11}\}$  half-clusters linked through a trans- $\text{Dmg}^{2-}$  ligand.

### 3. XPS spectra of $\{\text{Ti}_{22}\text{Fc}_4\}$

The XPS spectra of  $\{\text{Ti}_{22}\text{Fc}_4\}$  shows that the Ti 2p spectra has two peaks with binding energies of 457.6 and 463.6 eV, representing the  $2p^{2/3}$  and  $2p^{1/2}$  states of Ti(IV) respectively, while the Fe 2p peaks with binding energies of 706.9 and 719.6 eV correspond to electrons in the  $2p^{2/3}$  and  $2p^{1/2}$  states of Fe(II), respectively.

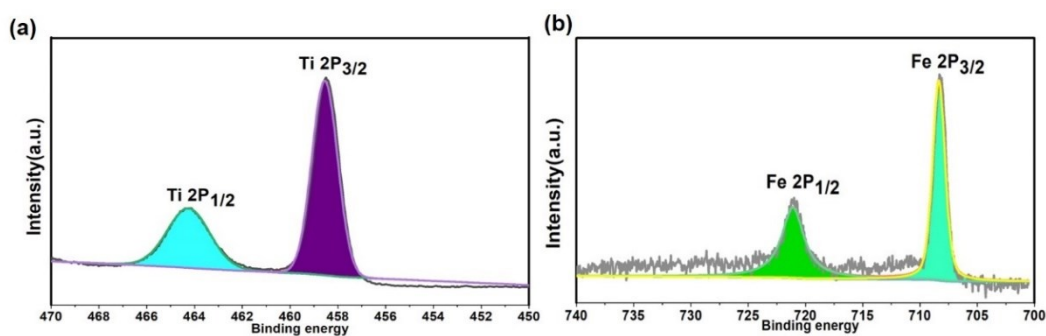

**Figure S9.** The XPS spectra of  $\{\text{Ti}_{22}\text{Fc}_4\}$ .

### 4. Powder X-ray diffraction

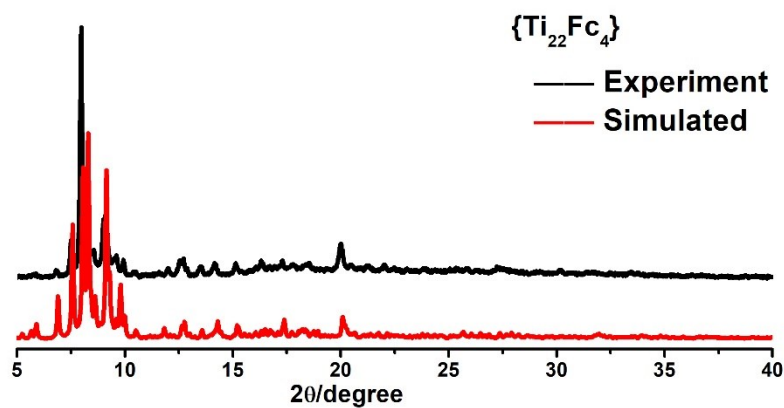

**Figure S10.** The XRD patterns of  $\{\text{Ti}_{22}\text{Fc}_4\}$ .

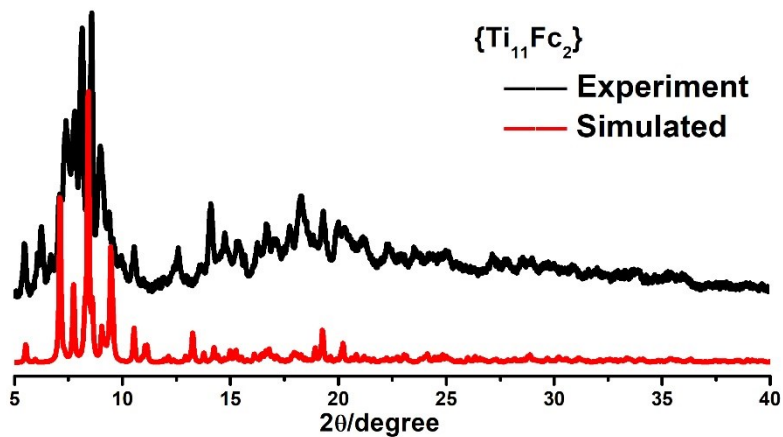

Figure S11. The XRD patterns of  $\{\text{Ti}_{11}\text{Fc}_2\}$ .

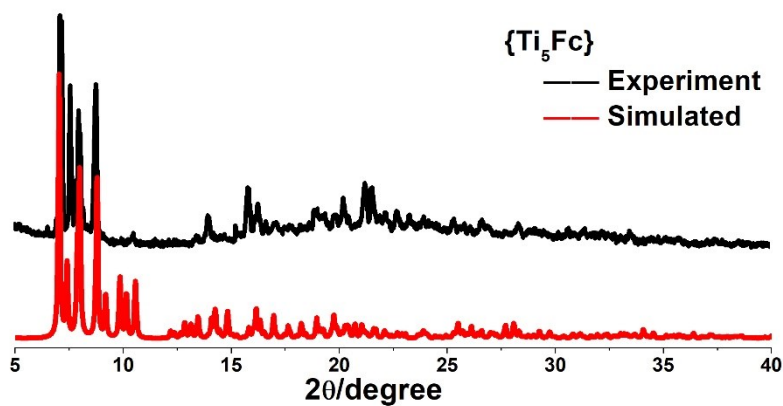

Figure S12. The XRD patterns of  $\{\text{Ti}_5\text{Fc}\}$ .

## 5. EDS patterns

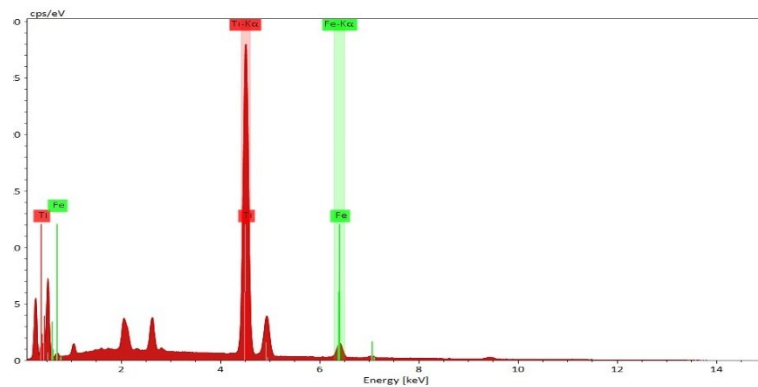

Figure S13. The EDS patterns of  $\{\text{Ti}_5\text{Fc}\}$ .

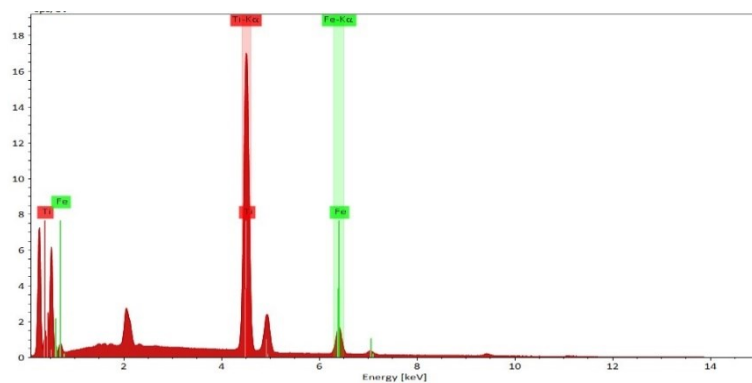

Figure S14. The EDS patterns of {Ti<sub>11</sub>Fc<sub>2</sub>}.

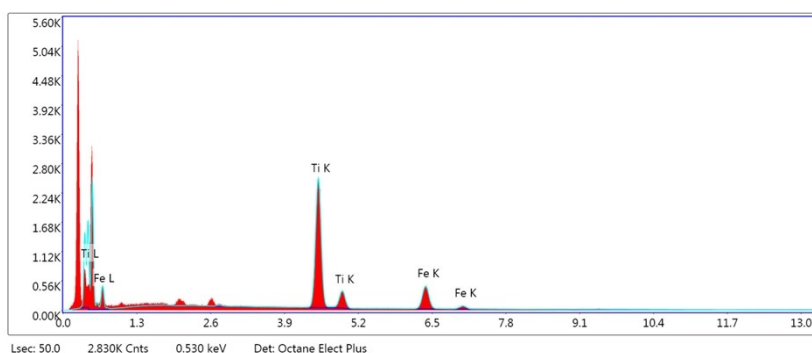

Figure S15. The EDS patterns of {Ti<sub>22</sub>Fc<sub>4</sub>}.

## 6. IR spectra

Figure S20-22 shows the FTIR spectra of three clusters. The broad band between 3200-3500 cm<sup>-1</sup> attributable to OH stretching. The strong vibration band at ca. 1620-1650 cm<sup>-1</sup> can be ascribed to C=O stretching of the Fdc<sup>2-</sup> ligand. The characteristic bands of Ti-O-C and Ti-O-Ti appears in the ranges of 1000–1200 and 700–800 cm<sup>-1</sup>, respectively. The characteristic peak of Fe-C vibration of the fFdc<sup>2-</sup> ligand appears in the ranges of 500–600 cm<sup>-1</sup>, respectively.

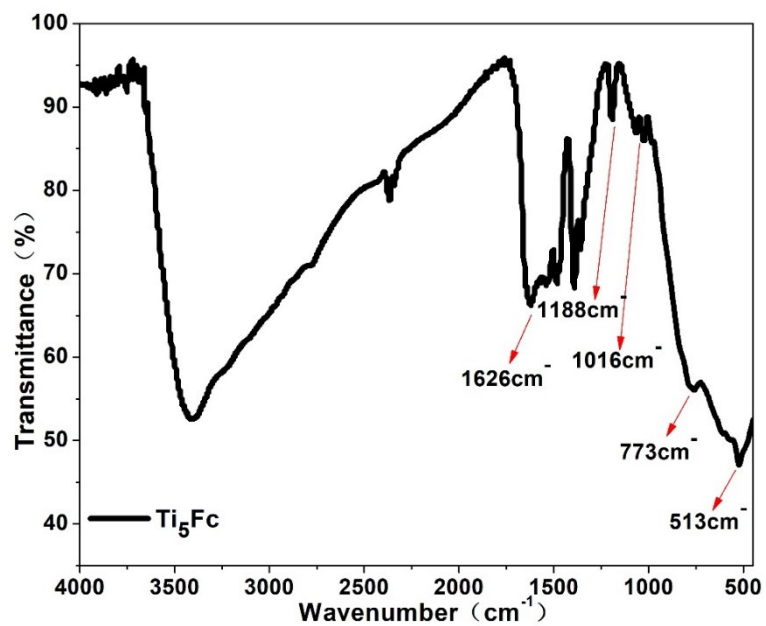

Figure S16. IR spectra of crystal sample of  $\{\text{Ti}_5\text{Fc}\}$ .

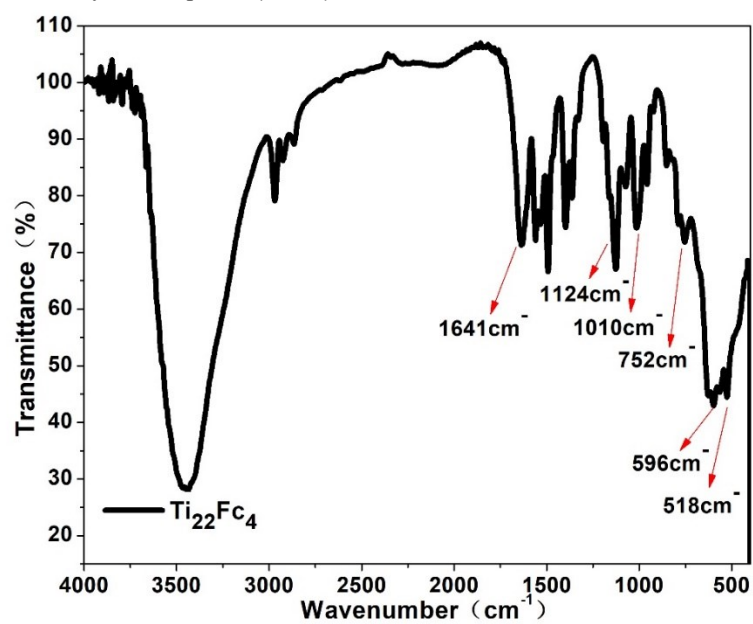

Figure S17. IR spectra of crystal sample of  $\{\text{Ti}_{11}\text{Fc}_2\}$ .



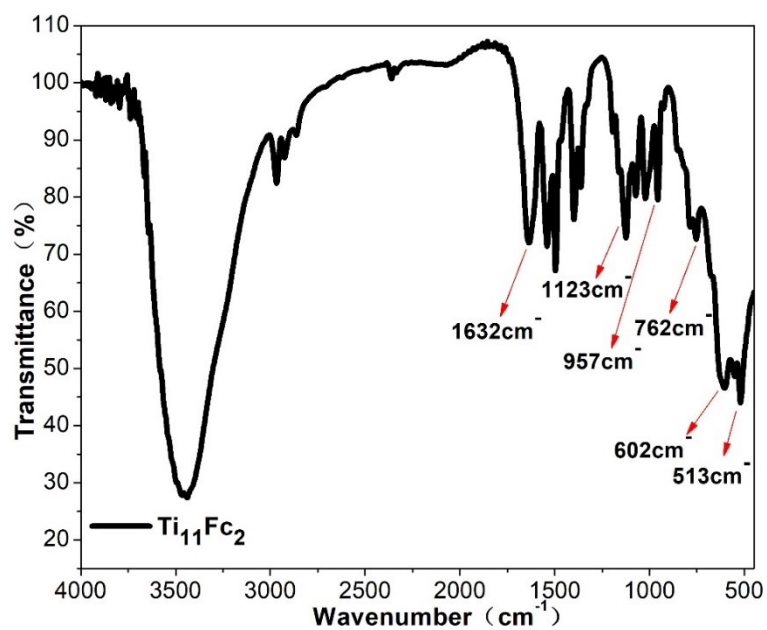

Figure S18. IR spectra of crystal sample of  $\{\text{Ti}_{22}\text{Fc}_4\}$ .

## 7. TG-Measurement

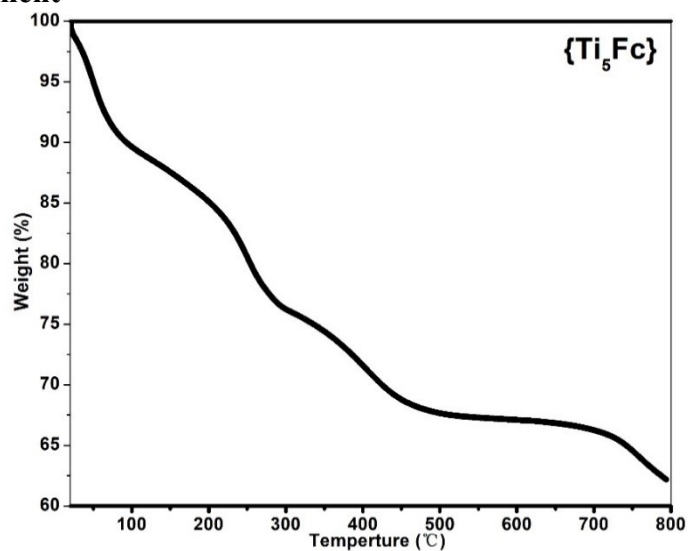

Figure S19. Thermal decomposition curve of  $\{\text{Ti}_5\text{Fc}\}$ .

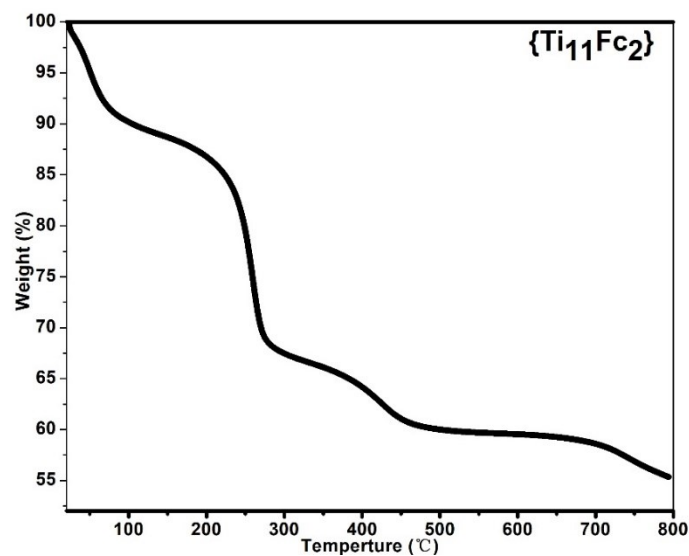

Figure S20. Thermal decomposition curve of  $\{\text{Ti}_{11}\text{Fc}_2\}$

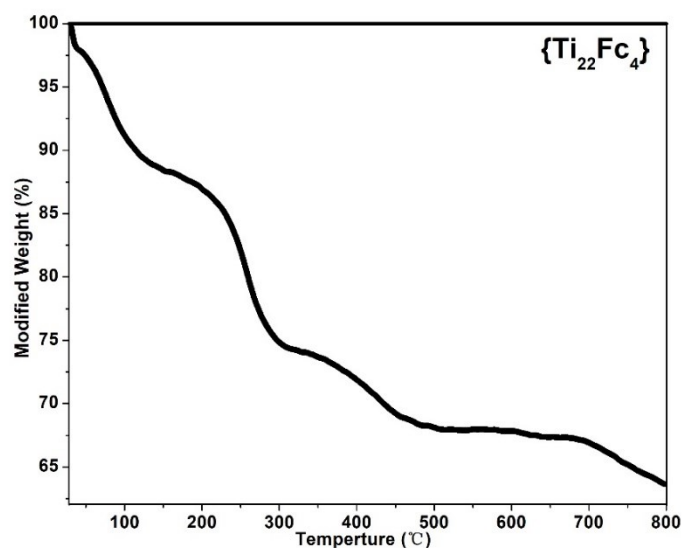

Figure S21. Thermal decomposition curve of  $\{\text{Ti}_{22}\text{Fc}_4\}$ .

## 8. ESI-MS measurements.

### $\{\text{Ti}_5\text{Fc}\}$

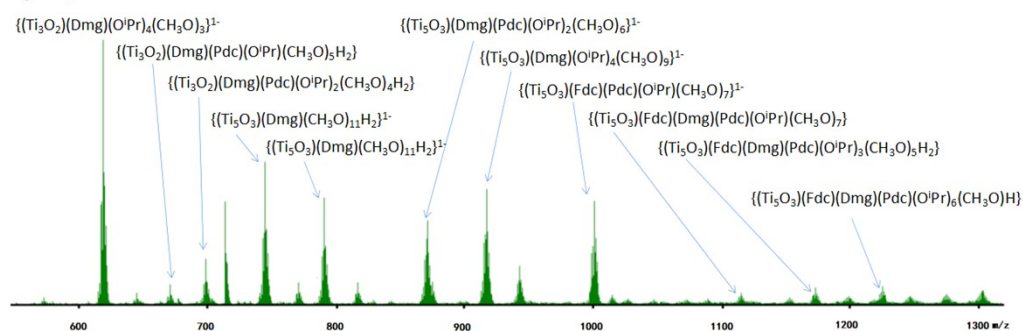

Figure S22. ESI-MS spectrum of the  $\text{CH}_3\text{OH}$  solution of  $\{\text{Ti}_5\text{Fc}\}$ .

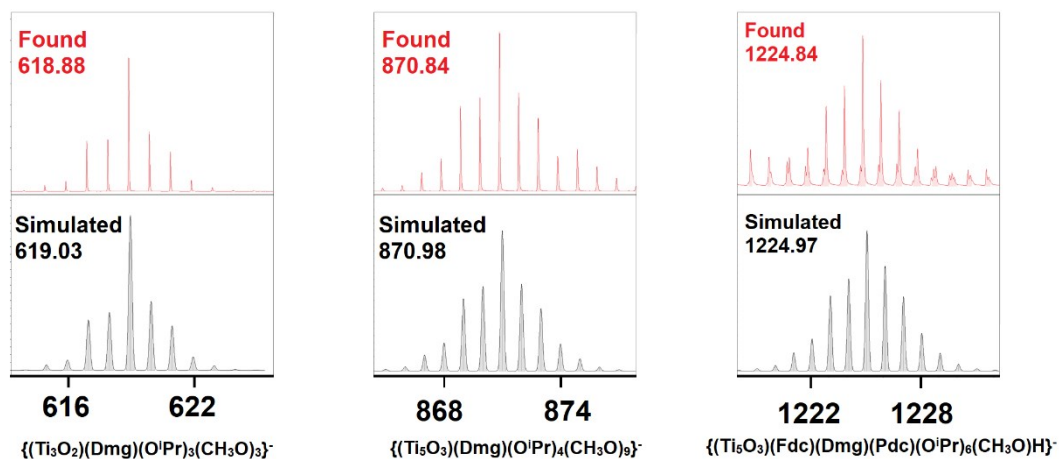

Figure S23. The isotope distributions of main peaks of ESI-MS spectrum of  $\{\text{Ti5Fc}\}$ .

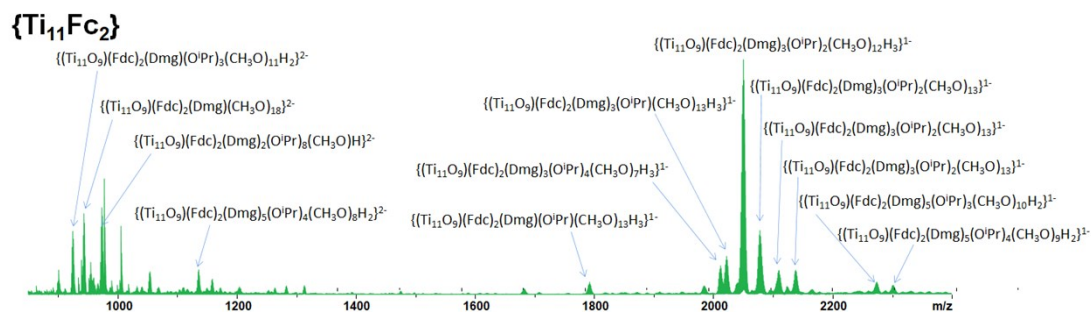

Figure S24. ESI-MS spectrum of the  $\text{CH}_3\text{OH}$  solution of  $\{\text{Ti}_{11}\text{Fc}_2\}$ .

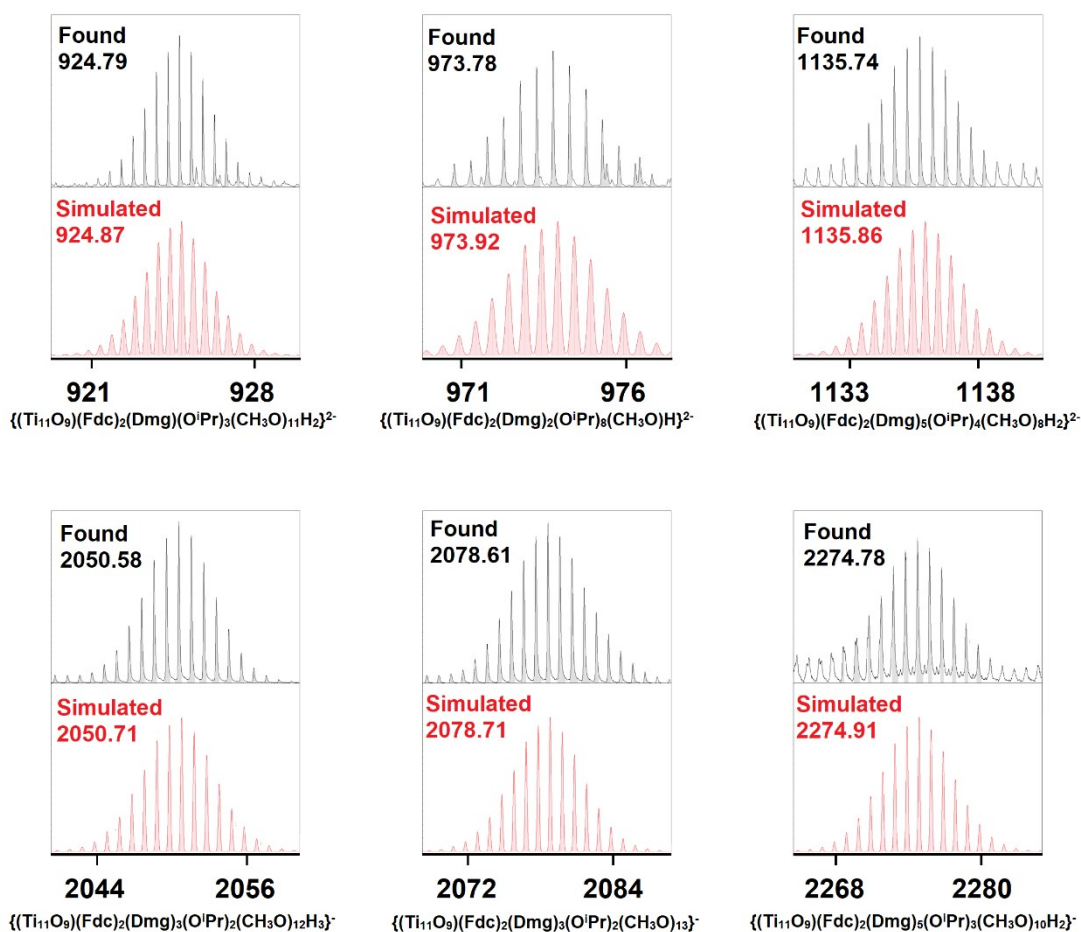

Figure S25. The isotope distributions of main peaks of ESI-MS spectrum of  $\{\text{Ti}_{11}\text{Fc}_2\}$ .

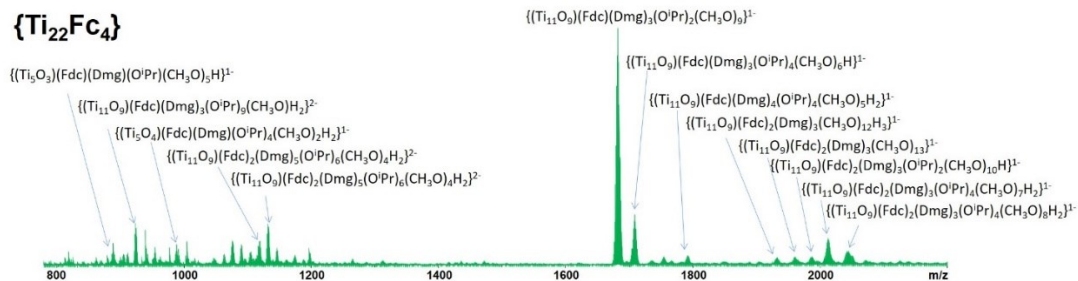

Figure S26. ESI-MS spectrum of the  $\text{CH}_3\text{OH}$  solution of  $\{\text{Ti}_{22}\text{Fc}_4\}$ .

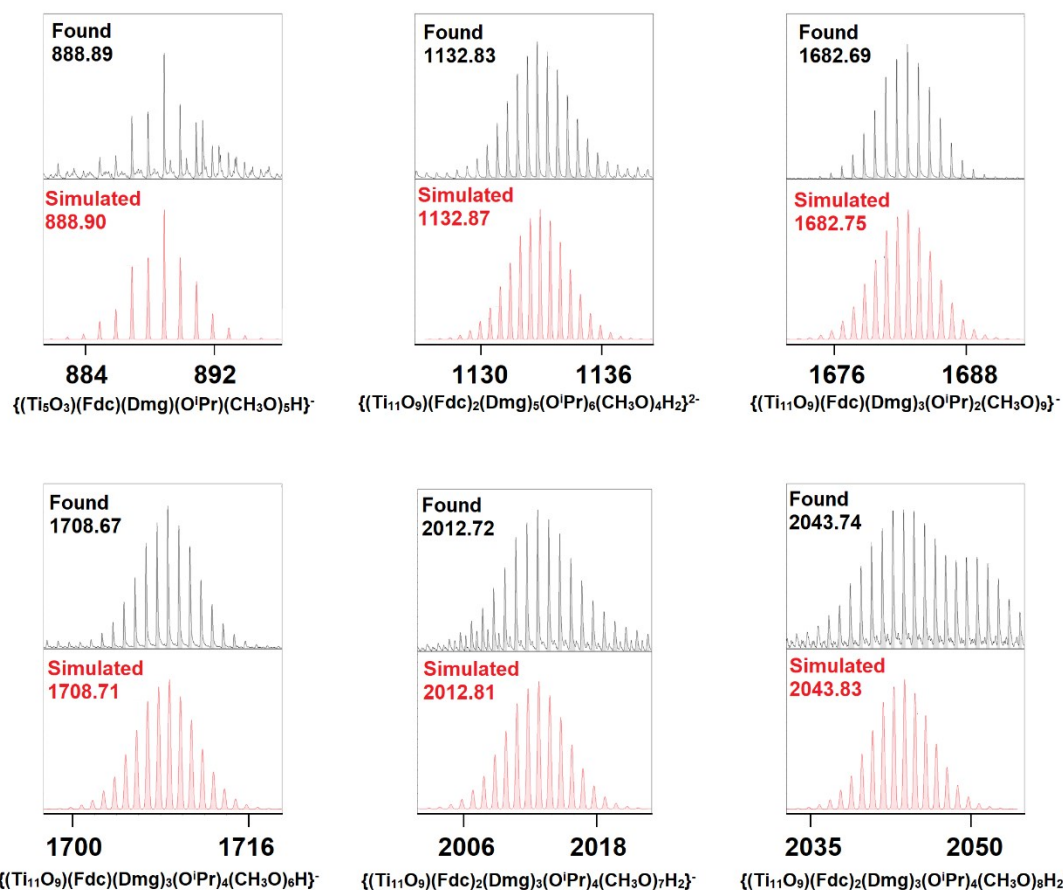

Figure S27. The isotope distributions of main peaks of ESI-MS spectrum of  $\{\text{Ti}_2\text{Fc}_4\}$ .

## 10 Photocatalysis

Table S2. The optimization of different reaction conditions of benzylamine to N-benzylidene-1-phenylmethanamine <sup>a</sup>

| Entry           | Cat.                            | Sol.                   | Temp.(°C) | TBHP( $\mu\text{L}$ )             | Yield(%) <sup>b</sup> |
|-----------------|---------------------------------|------------------------|-----------|-----------------------------------|-----------------------|
| 1               | $\{\text{Ti}_5\text{Fc}\}$      | $\text{CH}_3\text{CN}$ | 70        | 300                               | 99                    |
| 2               | none                            | $\text{CH}_3\text{CN}$ | 70        | 300                               | 12                    |
| 3               | $\{\text{Ti}_5\text{Fc}\}$      | $\text{CH}_3\text{CN}$ | 70        | 0                                 | 4                     |
| 4               | $\{\text{Ti}_5\text{Fc}\}$      | $\text{CH}_3\text{CN}$ | 70        | ( $\text{H}_2\text{O}_2$ )<br>300 | 2                     |
| 5               | $\{\text{Ti}_5\text{Fc}\}$      | $\text{CH}_3\text{CN}$ | 70        | ( $\text{O}_2$ )<br>1 atm         | 3                     |
| 6               | $\{\text{Ti}_5\text{Fc}\}$      | $\text{CH}_3\text{CN}$ | 70        | 100                               | 59                    |
| 7               | $\{\text{Ti}_5\text{Fc}\}$      | $\text{CH}_3\text{CN}$ | 70        | 200                               | 79                    |
| 8 <sup>c</sup>  | $\{\text{Ti}_5\text{Fc}\}$      | $\text{CH}_3\text{CN}$ | 70        | 350                               | 92                    |
| 9               | $\{\text{Ti}_5\text{Fc}\}$      | $\text{CH}_3\text{CN}$ | 45        | 300                               | 94                    |
| 10              | $\{\text{Ti}_5\text{Fc}\}$      | $\text{CH}_3\text{CN}$ | 20        | 300                               | 88                    |
| 11              | $\{\text{Ti}_5\text{Fc}\}$      | Ethanol                | 70        | 300                               | 80                    |
| 12              | $\{\text{Ti}_5\text{Fc}\}$      | Toluene                | 70        | 300                               | 77                    |
| 13              | $\{\text{Ti}_5\text{Fc}\}$      | 1,4-Dioxane            | 70        | 300                               | 12                    |
| 14              | $\{\text{Ti}_5\text{Fc}\}$      | DMF                    | 70        | 300                               | 65                    |
| 15              | $\{\text{Ti}_5\text{Fc}\}$      | DMSO                   | 70        | 300                               | 40                    |
| 16 <sup>d</sup> | $\{\text{Ti}_5\text{Fc}\}$      | $\text{CH}_3\text{CN}$ | 70        | 300                               | 27                    |
| 17              | $\{\text{Ti}_{11}\text{Fc}_2\}$ | $\text{CH}_3\text{CN}$ | 70        | 300                               | 95                    |

|    |                                     |                    |    |     |    |
|----|-------------------------------------|--------------------|----|-----|----|
| 18 | {Ti <sub>22</sub> Fc <sub>4</sub> } | CH <sub>3</sub> CN | 70 | 300 | 90 |
|----|-------------------------------------|--------------------|----|-----|----|

<sup>a</sup> Reaction conditions: substrate, benzylamine (110 μL, 1 mmol); catalyst (0.02 mmol); solvent (2 mL); TBHP=tert-butyl hydroperoxide; 12 h. <sup>b</sup> Determined by GC analysis and <sup>1</sup>H NMR, and the selectivity of imine is over 99% unless specifically mentioned. <sup>c</sup> Convention of benzylidene is 99%, selectivity of *N*-benzylidene-1-phenylmethanamine is 95%. <sup>d</sup> Using sunlight replaces Xe lamp.

**Table S3.** The time conversion for benzylamine to *N*-benzylidene-1-phenylmethanamine under the optimization condition <sup>a</sup>

| Entry | Cat.                                | Oxidant | Time | Addition | Yield <sup>b</sup> |
|-------|-------------------------------------|---------|------|----------|--------------------|
| 1     | {Ti <sub>5</sub> Fc}                | TBHP    | 3    | None     | 50%                |
| 2     | {Ti <sub>5</sub> Fc}                | TBHP    | 5    | None     | 81%                |
| 3     | {Ti <sub>5</sub> Fc}                | TBHP    | 8    | None     | 95%                |
| 4     | {Ti <sub>5</sub> Fc}                | TBHP    | 10   | None     | 98%                |
| 5     | {Ti <sub>5</sub> Fc}                | TBHP    | 12   | None     | 99%                |
| 6     | {Ti <sub>11</sub> Fc <sub>2</sub> } | TBHP    | 3    | None     | 52%                |
| 7     | {Ti <sub>11</sub> Fc <sub>2</sub> } | TBHP    | 5    | None     | 76%                |
| 8     | {Ti <sub>11</sub> Fc <sub>2</sub> } | TBHP    | 8    | None     | 88%                |
| 9     | {Ti <sub>11</sub> Fc <sub>2</sub> } | TBHP    | 10   | None     | 93%                |
| 10    | {Ti <sub>11</sub> Fc <sub>2</sub> } | TBHP    | 12   | None     | 95%                |
| 11    | {Ti <sub>22</sub> Fc <sub>4</sub> } | TBHP    | 3    | None     | 50%                |
| 12    | {Ti <sub>22</sub> Fc <sub>4</sub> } | TBHP    | 5    | None     | 76%                |
| 13    | {Ti <sub>22</sub> Fc <sub>4</sub> } | TBHP    | 8    | None     | 85%                |
| 14    | {Ti <sub>22</sub> Fc <sub>4</sub> } | TBHP    | 10   | None     | 89%                |
| 15    | {Ti <sub>22</sub> Fc <sub>4</sub> } | TBHP    | 12   | None     | 90%                |

<sup>a</sup> Reaction conditions: substrate, benzylamine (110 μL, 1 mmol), catalyst (0.02 mmol), TBHP (300 μL), solvent (2 mL), Xe lamp. <sup>b</sup> Determined by GC analysis and <sup>1</sup>H NMR.

**Table S4.** The optimization of different reaction conditions of benzylamine to *N*-benzylidene-1-phenylmethanamine <sup>a</sup>

| Entry | Cat.                             | Oxidant | Time | Addition                             | Yield <sup>b</sup> |
|-------|----------------------------------|---------|------|--------------------------------------|--------------------|
| 1     | {Ti <sub>5</sub> Fc}             | TBHP    | 12   | benzoquinone                         | 42%                |
| 2     | {Ti <sub>5</sub> Fc}             | TBHP    | 12   | EDTA-2Na                             | 56%                |
| 3     | {Ti <sub>5</sub> Fc}             | TBHP    | 12   | Mn(CH <sub>3</sub> COO) <sub>2</sub> | 47%                |
| 4     | Fc                               | TBHP    | 70   | 300                                  | 12                 |
| 5     | TiO <sub>2</sub>                 | TBHP    | 70   | 300                                  | 18                 |
| 6     | Fc+TiO <sub>2</sub> <sup>c</sup> | TBHP    | 12   | None                                 | 40%                |

<sup>a</sup> Reaction conditions: substrate, benzylamine (110 μL, 1 mmol), catalyst (0.02 mmol), TBHP (300 μL), solvent (2 mL), Xe lamp. <sup>b</sup> Determined by GC analysis and <sup>1</sup>H NMR. <sup>c</sup> The mixture were obtained by grinding of Fc and TiO<sub>2</sub> with the molar ratio of 1:1.

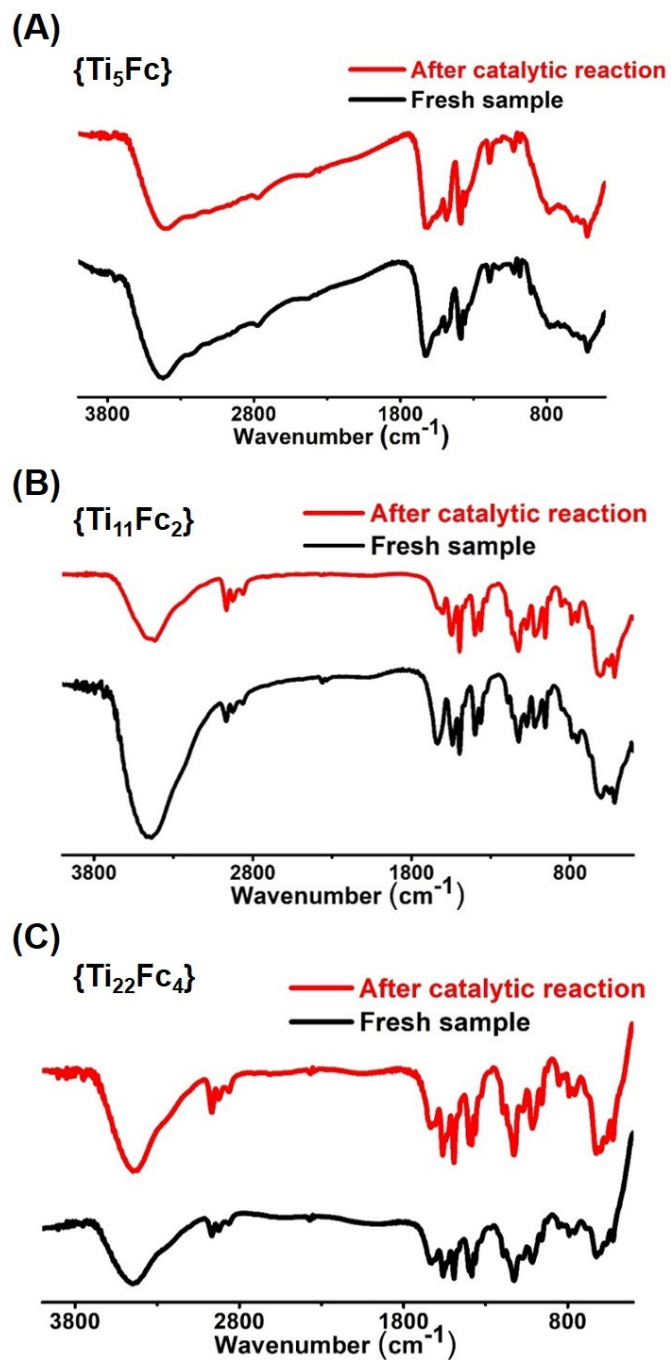

Figure S28. The IR spectrum of  $\{\text{Ti}_x\text{Fc}_y\}$  before and after reaction.

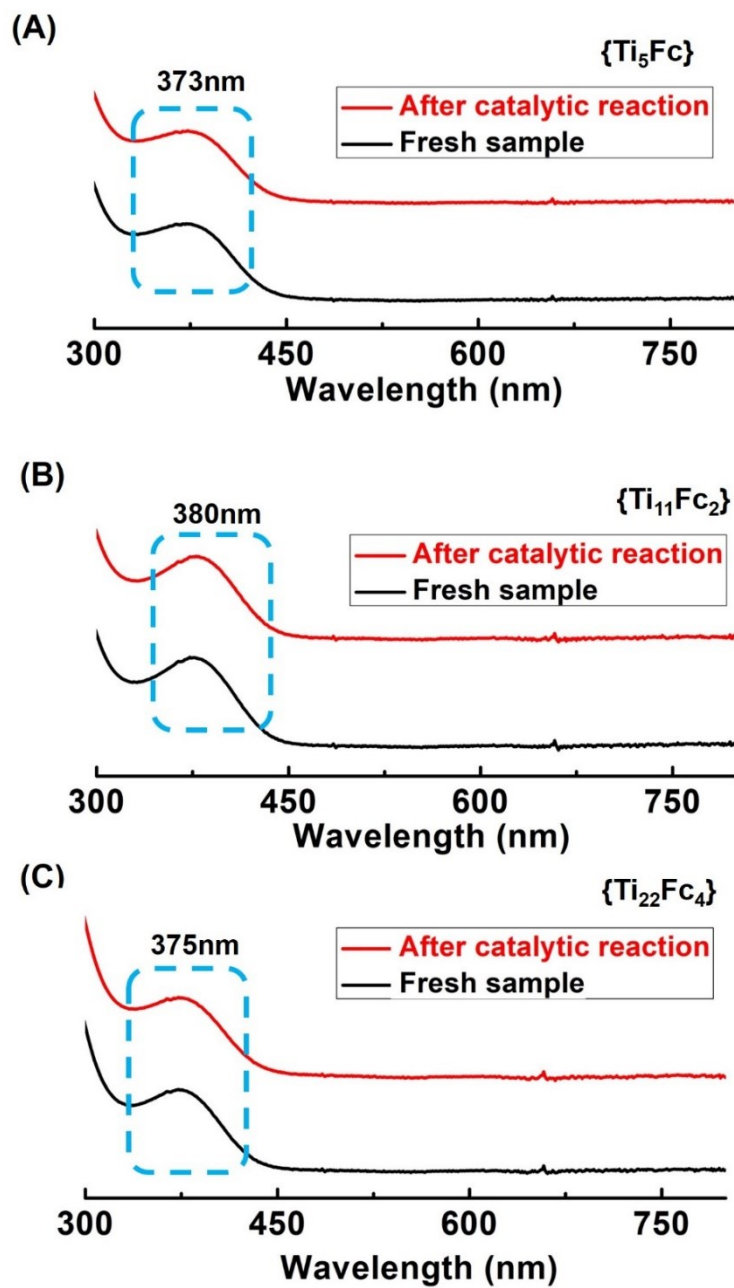

Figure S29. The solution-state UV-Vis spectra of three clusters before and after reaction.



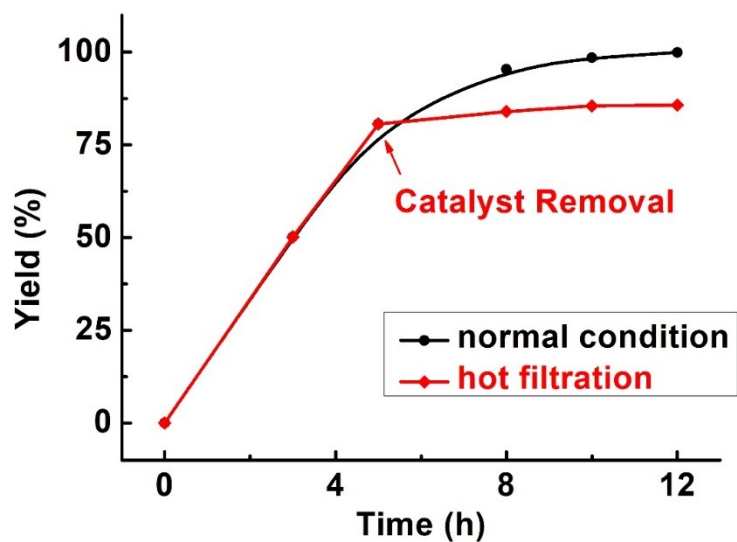

Figure S30. Hot-filtration test of benzylamine oxidation reaction catalytic by  $\{\text{Ti}_5\text{Fc}\}$  at optimal condition.

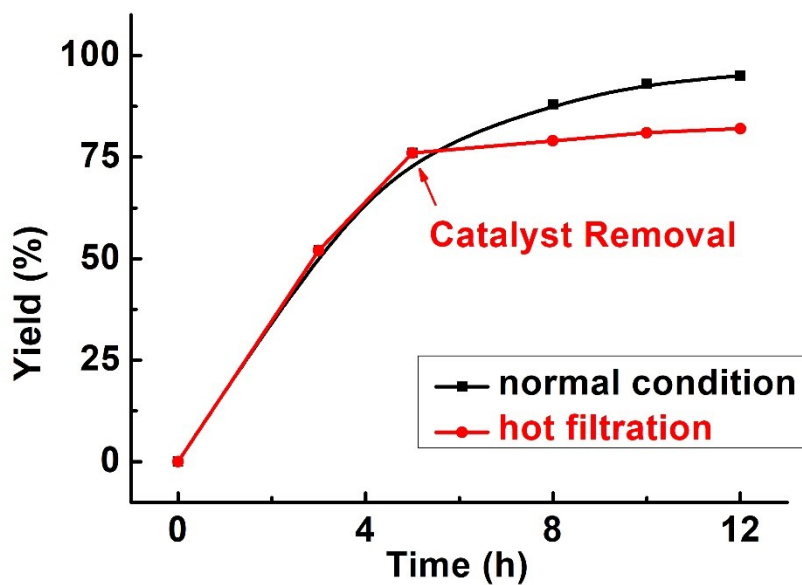

Figure S31. Hot-filtration test of benzylamine oxidation reaction catalytic by  $\{\text{Ti}_{11}\text{Fc}_2\}$  at optimal condition.

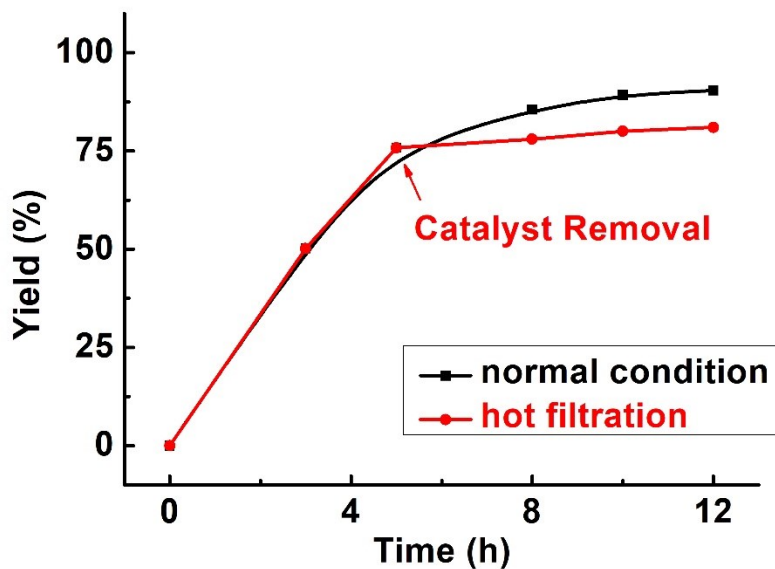

Figure S32. Hot-filtration test of benzylamine oxidation reaction catalytic by  $\{\text{Ti}_{12}\text{Fc}_4\}$  at optimal condition.

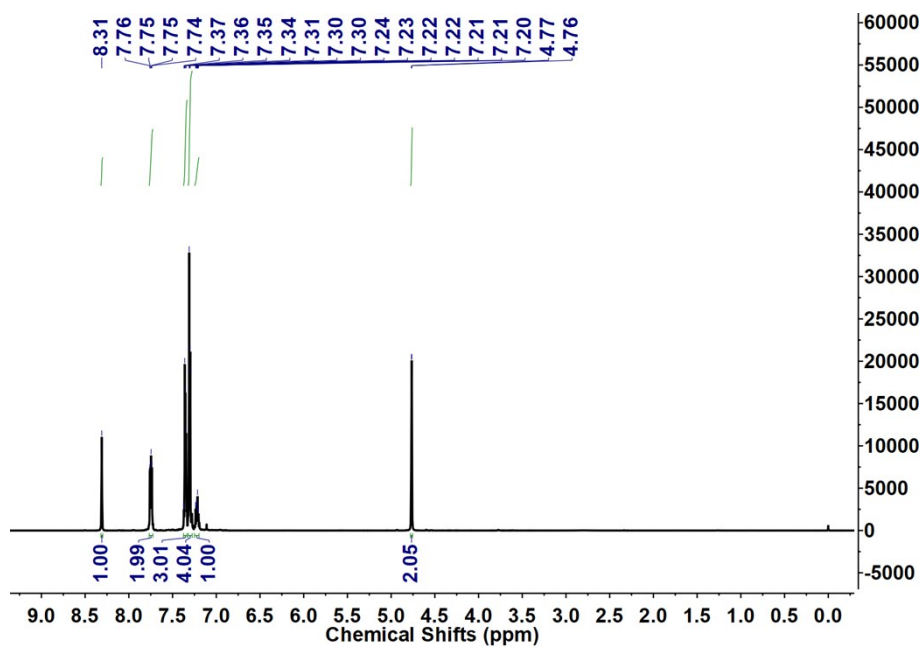

Figure S33. The  $^1\text{H}$  NMR spectra of N-benzylidene-1-phenylmethanamine.

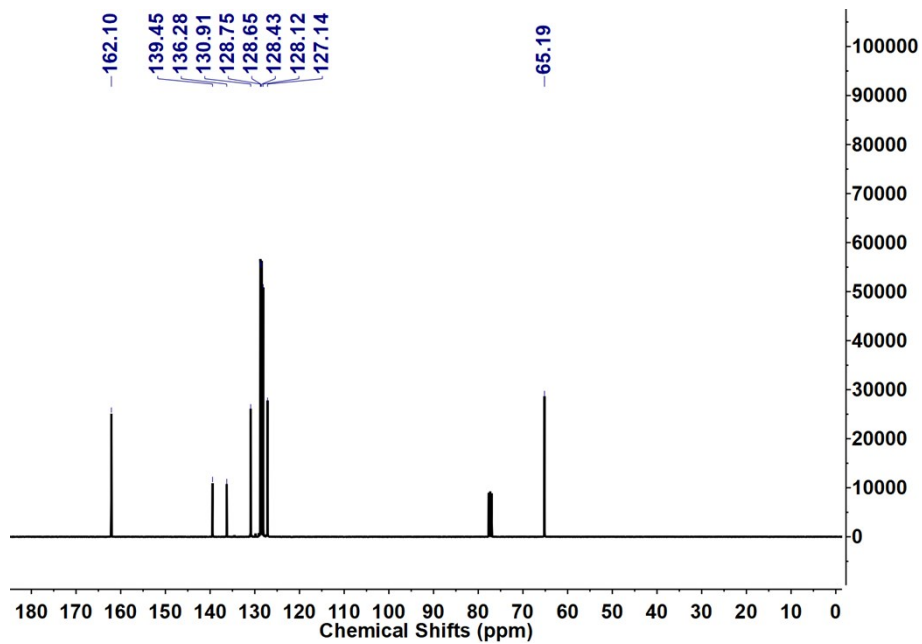

**Figure S34.** The  $^{13}\text{C}$  NMR spectra of *N*-benzylidene-1-phenylmethanamine.
